# Supplementary material for: Color Variability Constrains Detection of Geometrically Perfect Mirror Symmetry
Source: MDPI journal article supplement (doi:10.3390/computation10060099), 2022-06-16
Supplement: s1 [file s1]

Python Codepage

```
# '''Copyright (C) <2019> Birgitta Dresch-Langley  
  
# This program is free software: you can redistribute it and/or modify  
  
# it under the terms of the GNU General Public License as published by  
  
# the Free Software Foundation, either version 3 of the License, or  
  
# (at your option) any later version.  
  
# This program is distributed in the hope that it will be useful,  
  
# but WITHOUT ANY WARRANTY; without even the implied warranty of  
  
# MERCHANTABILITY or FITNESS FOR A PARTICULAR PURPOSE. See the  
  
# GNU General Public License for more details.  
  
# <https://www.gnu.org/licenses/>.'''
```

```
from tkinter import *
```

```
import RTimagesRandomOrder
```

```
import os
```

```
class Menu :
```

```
    def __init__(self):
```

```
        # initializations
```

```
        self.fenetre = Tk()
```

```
        self.fenetre.title("Welcome v2")
```

```
        largeur_ecran = self.fenetre.winfo_screenheight()
```

```
        longueur_ecran = self.fenetre.winfo_screenwidth()
```

```
        self.fenetre.geometry("250x600"+"str(int(longueur_ecran/2-125))"+"str(int(largeur_ecran/2-300)))
```

```
        # window labels
```

```

label = Label(self.fenetre, text="Welcome")

label.pack(pady=5)


# alert sounds

Frame1 = Frame(self.fenetre, borderwidth=2, relief=GROOVE)

Frame1.pack(pady=10)

Label(Frame1, text="Please choose the desired frequency").pack(padx=10, pady=10)

self.son = IntVar()

bouton1 = Radiobutton(Frame1, text="No sound", variable=self.son, value=0)

bouton2 = Radiobutton(Frame1, text="Low frequency", variable=self.son, value=1)

bouton3 = Radiobutton(Frame1, text="Medium frequency", variable=self.son, value=2)

bouton4 = Radiobutton(Frame1, text="High frequency", variable=self.son, value=3)

bouton1.pack(pady=5)

bouton2.pack(pady=5)

bouton3.pack(pady=5)

bouton4.pack(pady=5)

bouton1.select()


# backgrounds

Frame2 = Frame(self.fenetre, borderwidth=2, relief=GROOVE)

Frame2.pack(pady=10, padx=5)

Label(Frame2, text="Please choose the background color").pack(padx=10, pady=10)

self.fond = IntVar()

bouton1 = Radiobutton(Frame2, text="White background", variable=self.fond, value=0)

bouton2 = Radiobutton(Frame2, text="Gray background", variable=self.fond, value=1)

bouton1.pack(pady=5)

bouton2.pack(pady=5)

bouton1.select()

```

```

# excel file name

self.file_xl_name = StringVar()

file_xl = Label(self.fenetre, text="Enter your initials and session number")

file_xl.pack(pady=5)

file_xl_ent = Entry(self.fenetre, textvariable=self.file_xl_name)

file_xl_ent.pack()


# start preliminary trials (fct begin)

Begin = Button(self.fenetre, text = 'Begin the test', command=self.begin)

Begin.pack(pady=10)


# start a test session (fct begin)

BeginAll = Button(self.fenetre, text = 'Begin the complete test', command=self.beginAll)

BeginAll.pack(pady=10)


# end a test session (fct end)

End = Button(self.fenetre, text = 'End the test', command=self.end)

End.pack(pady=10)


self.fenetre.mainloop()


def begin(self):

    if not os.path.exists("RESULTS/"):

        os.makedirs("RESULTS/")

    nom = self.file_xl_name.get()

    self.fenetre.destroy()

    birgittaSoftware = RTimagesRandomOrder.RTimagesRandomOrder( nom,self.fond.get(),self.son.get())

```

```
birgittaSoftware.showImages()
```

```
def beginAll(self):
```

```
    self.fenetre.destroy()
```

```
    if not os.path.exists("RESULTS/" + self.file_xl_name.get()):
```

```
        os.makedirs("RESULTS/" + self.file_xl_name.get())
```

```
    for i in range(0,8):
```

```
        birgittaSoftware = RTimagesRandomOrder.RTimagesRandomOrder( self.file_xl_name.get() + '/' +  
self.file_xl_name.get()+str(i+1),int(i/4),i%4)
```

```
        birgittaSoftware.showImages()
```

```
def end(self):
```

```
    self.fenetre.destroy()
```

```
    sys.exit()
```

```
if __name__ == '__main__':
```

```
    menu = Menu()
```
