# Supplementary material for: Color Variability Constrains Detection of Geometrically Perfect Mirror Symmetry
Source: MDPI journal article supplement (doi:10.3390/computation10060099), 2022-06-16
Supplement: s1 [file s1]

## **Expérience Sym 2**

Je, soussigné(e) déclare avoir été informée sur les conditions de cette expérience psychophysique avec images et sons et du fait que je peux me retirer de l'expérience a tout moment. Par ma signature, je me déclare volontaire a participer ayant compris ce qui m'est demandé.

Strasbourg, le

.....

*Signature du participant*
