# Supplementary material for: Color Variability Constrains Detection of Geometrically Perfect Mirror Symmetry
Source: MDPI journal article supplement (doi:10.3390/computation10060099), 2022-06-16
Supplement: s1 [file s1]

## Two Way Analysis of Variance

jeudi, mai 26, 2022, 14:36:44

**Data source:** SymmetryRT.JNB

Balanced Design

Dependent Variable: IndividualsAverageRT

| Source of Variation | DF  | SS           | MS          | F       | P      |
|---------------------|-----|--------------|-------------|---------|--------|
| Hue                 | 1   | 292604,167   | 292604,167  | 64,266  | <0,001 |
| Variability         | 4   | 14154969,000 | 3538742,250 | 777,230 | <0,001 |
| Hue x Variability   | 4   | 1674091,667  | 418522,917  | 91,922  | <0,001 |
| Residual            | 140 | 637422,667   | 4553,019    |         |        |
| Total               | 149 | 16759087,500 | 112477,097  |         |        |

Main effects cannot be properly interpreted if significant interaction is determined. This is because the size of a factor's effect depends upon the level of the other factor.

The effect of different levels of Hue depends on what level of Variability is present. There is a statistically significant interaction between Hue and Variability. ( $P = <0,001$ )

Power of performed test with  $\alpha = 0,0500$ : for Hue : 1,000

Power of performed test with  $\alpha = 0,0500$ : for Variability : 1,000

Power of performed test with  $\alpha = 0,0500$ : for Hue x Variability : 1,000

Least square means for Hue :

| Group                      | Mean     |
|----------------------------|----------|
| Color                      | 1121,467 |
| Achromatic                 | 1033,133 |
| Std Err of LS Mean = 8,591 |          |

Least square means for Variability :

| Group | Mean     |
|-------|----------|
| A     | 589,600  |
| B     | 954,100  |
| C     | 1055,600 |
| D     | 1298,100 |
| E     | 1489,100 |

Std Err of LS Mean = 12,319

Least square means for Hue x Variability :

| Group                       | Mean     |
|-----------------------------|----------|
| Color x A                   | 512,600  |
| Color x B                   | 885,600  |
| Color x C                   | 1112,600 |
| Color x D                   | 1408,933 |
| Color x E                   | 1687,600 |
| Achromatic x A              | 666,600  |
| Achromatic x B              | 1022,600 |
| Achromatic x C              | 998,600  |
| Achromatic x D              | 1187,267 |
| Achromatic x E              | 1290,600 |
| Std Err of LS Mean = 14,422 |          |

All Pairwise Multiple Comparison Procedures (Holm-Sidak method):  
Overall significance level = 0,05

Comparisons for factor: **Variability within Color**

| Comparison | Diff of Means | t      | Unadjusted P | Critical Level | Significant? |
|------------|---------------|--------|--------------|----------------|--------------|
| E vs. A    | 1175,000      | 47,689 | <0,001       | 0,005          | Yes          |
| D vs. A    | 896,333       | 36,379 | <0,001       | 0,006          | Yes          |
| E vs. B    | 802,000       | 32,550 | <0,001       | 0,006          | Yes          |
| C vs. A    | 600,000       | 24,352 | <0,001       | 0,007          | Yes          |
| E vs. C    | 575,000       | 23,337 | <0,001       | 0,009          | Yes          |
| D vs. B    | 523,333       | 21,240 | <0,001       | 0,010          | Yes          |
| B vs. A    | 373,000       | 15,139 | <0,001       | 0,013          | Yes          |
| D vs. C    | 296,333       | 12,027 | <0,001       | 0,017          | Yes          |
| E vs. D    | 278,667       | 11,310 | <0,001       | 0,025          | Yes          |
| C vs. B    | 227,000       | 9,213  | <0,001       | 0,050          | Yes          |

Comparisons for factor: **Variability within Achromatic**

| Comparison | Diff of Means | t      | Unadjusted P | Critical Level | Significant? |
|------------|---------------|--------|--------------|----------------|--------------|
| E vs. A    | 624,000       | 25,326 | <0,001       | 0,005          | Yes          |
| D vs. A    | 520,667       | 21,132 | <0,001       | 0,006          | Yes          |
| B vs. A    | 356,000       | 14,449 | <0,001       | 0,006          | Yes          |
| C vs. A    | 332,000       | 13,475 | <0,001       | 0,007          | Yes          |
| E vs. C    | 292,000       | 11,851 | <0,001       | 0,009          | Yes          |
| E vs. B    | 268,000       | 10,877 | <0,001       | 0,010          | Yes          |
| D vs. C    | 188,667       | 7,657  | <0,001       | 0,013          | Yes          |
| D vs. B    | 164,667       | 6,683  | <0,001       | 0,017          | Yes          |
| E vs. D    | 103,333       | 4,194  | <0,001       | 0,025          | Yes          |
| B vs. C    | 24,000        | 0,974  | 0,332        | 0,050          | No           |

Comparisons for factor: **Hue within A**

| Comparison           | Diff of Means | t     | Unadjusted P | Critical Level | Significant? |
|----------------------|---------------|-------|--------------|----------------|--------------|
| Achromatic vs. Color | 154,000       | 6,250 | <0,001       | 0,050          | Yes          |

Comparisons for factor: **Hue within B**

| Comparison           | Diff of Means | t     | Unadjusted P | Critical Level | Significant? |
|----------------------|---------------|-------|--------------|----------------|--------------|
| Achromatic vs. Color | 137,000       | 5,560 | <0,001       | 0,050          | Yes          |

Comparisons for factor: **Hue within C**

| Comparison           | Diff of Means | t     | Unadjusted P | Critical Level | Significant? |
|----------------------|---------------|-------|--------------|----------------|--------------|
| Color vs. Achromatic | 114,000       | 4,627 | <0,001       | 0,050          | Yes          |

Comparisons for factor: **Hue within D**

| Comparison           | Diff of Means | t     | Unadjusted P | Critical Level | Significant? |
|----------------------|---------------|-------|--------------|----------------|--------------|
| Color vs. Achromatic | 221,667       | 8,997 | <0,001       | 0,050          | Yes          |

Comparisons for factor: **Hue within E**

| Comparison           | Diff of Means | t      | Unadjusted P | Critical Level | Significant? |
|----------------------|---------------|--------|--------------|----------------|--------------|
| Color vs. Achromatic | 397,000       | 16,113 | <0,001       | 0,050          | Yes          |
